# Supplementary material for: A Physiologically Based ODE Model for an Old Pest: Modeling Life Cycle and Population Dynamics of Bactrocera oleae (Rossi)
Source: MDPI journal article supplement (doi:10.3390/agronomy12102298), 2022-09-24
Supplement: s1 [file s1]

**A physiologically based ODE model for an old pest: modelling life cycle and population dynamics of *Bactrocera oleae* (Rossi)**

Luca Rossini<sup>1,\*</sup>, Octavio A. Bruzzone<sup>2</sup>, Mario Contarini<sup>1,\*</sup>, Livio Bufacchi<sup>1</sup>, Stefano Speranza<sup>1</sup>

\* Correspondence: luca.rossini@unitus.it (LR), contarini@unitus.it (MC)

<sup>1</sup> Dipartimento di Scienze Agrarie e Forestali, Università degli Studi della Tuscia, Via San Camillo de Lellis snc, 01100 Viterbo, Italy

<sup>2</sup> IFAB, CONICET/INTA, Modesta Victoria 4450, San Carlos de Bariloche, Rio Negro, Argentina

Additional figures completing the results of the main text.

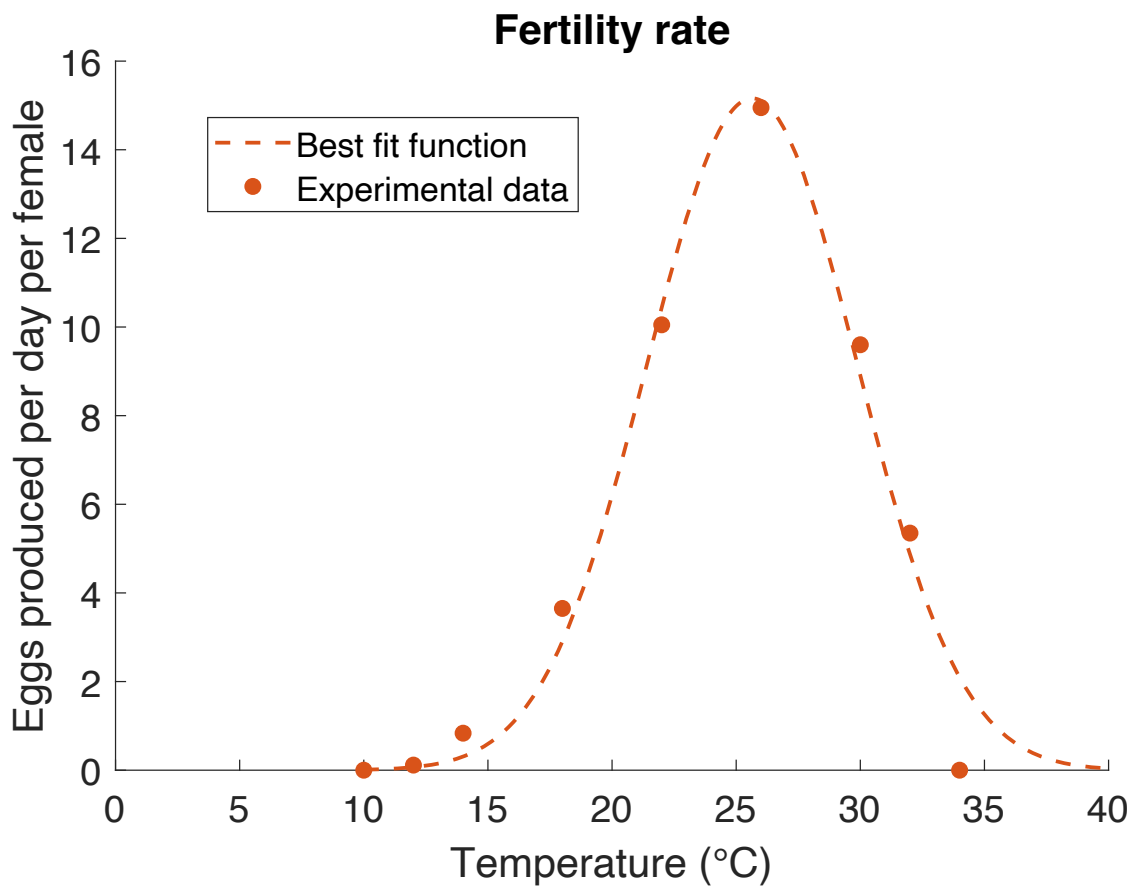

Figure S1: Best fit fertility rate function (9) and experimental data from Preu et al. [1].

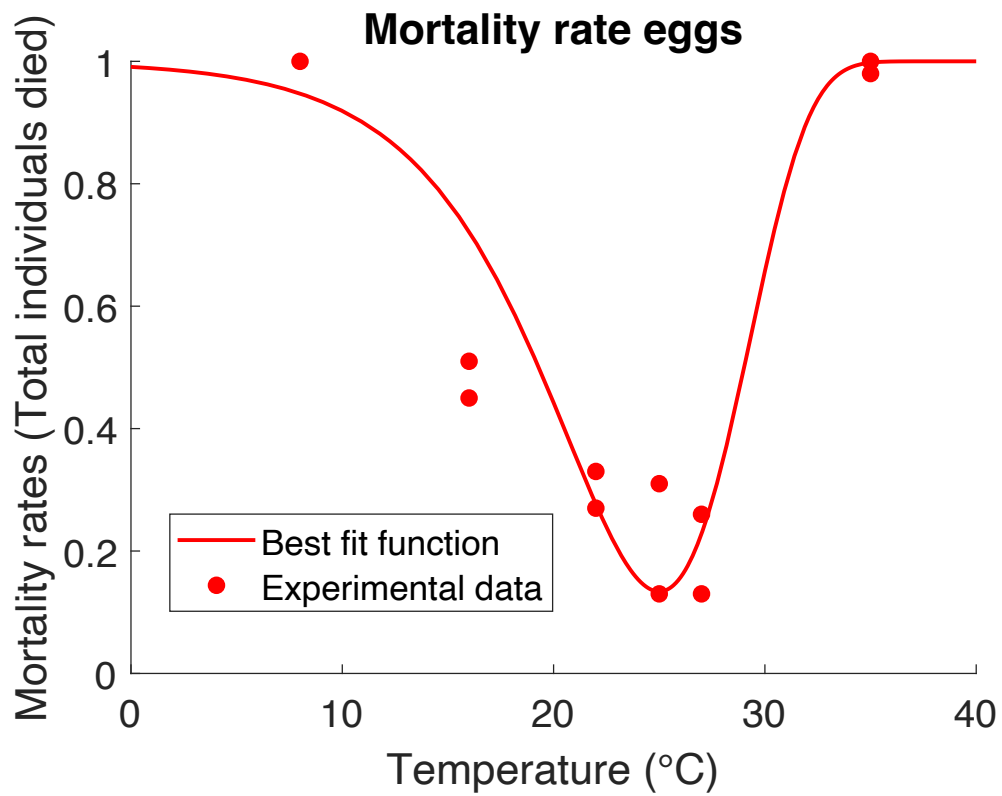

Figure S2: Best fit mortality rate function (7) for eggs and experimental data from Preu et al. [1].

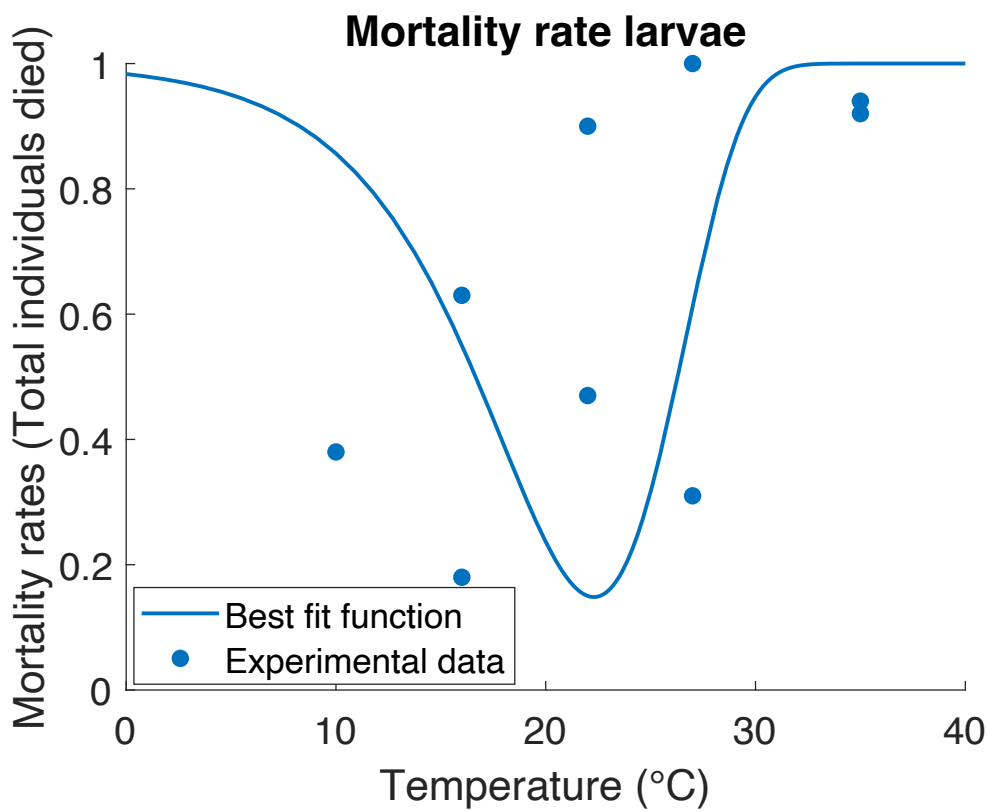

Figure S3: Best fit mortality rate function (7) for larvae and experimental data from Preu et al. [1].

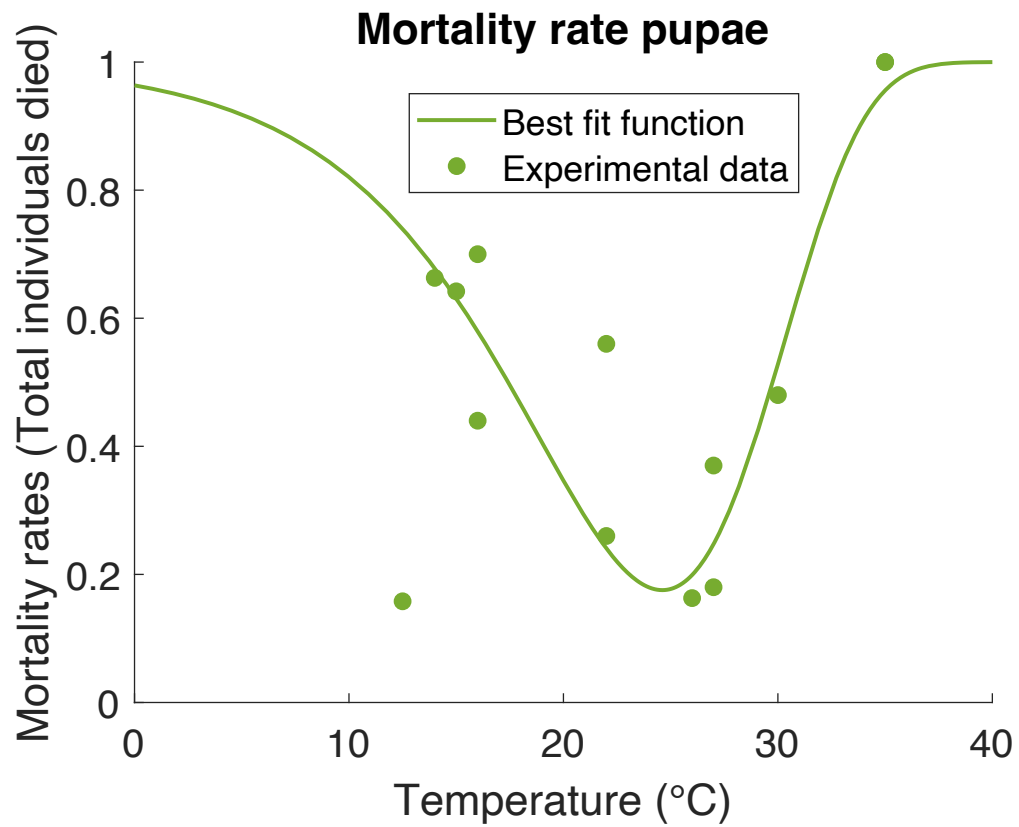

Figure S4: Best fit mortality rate function (7) for pupae and experimental data from Preu et al. [1].

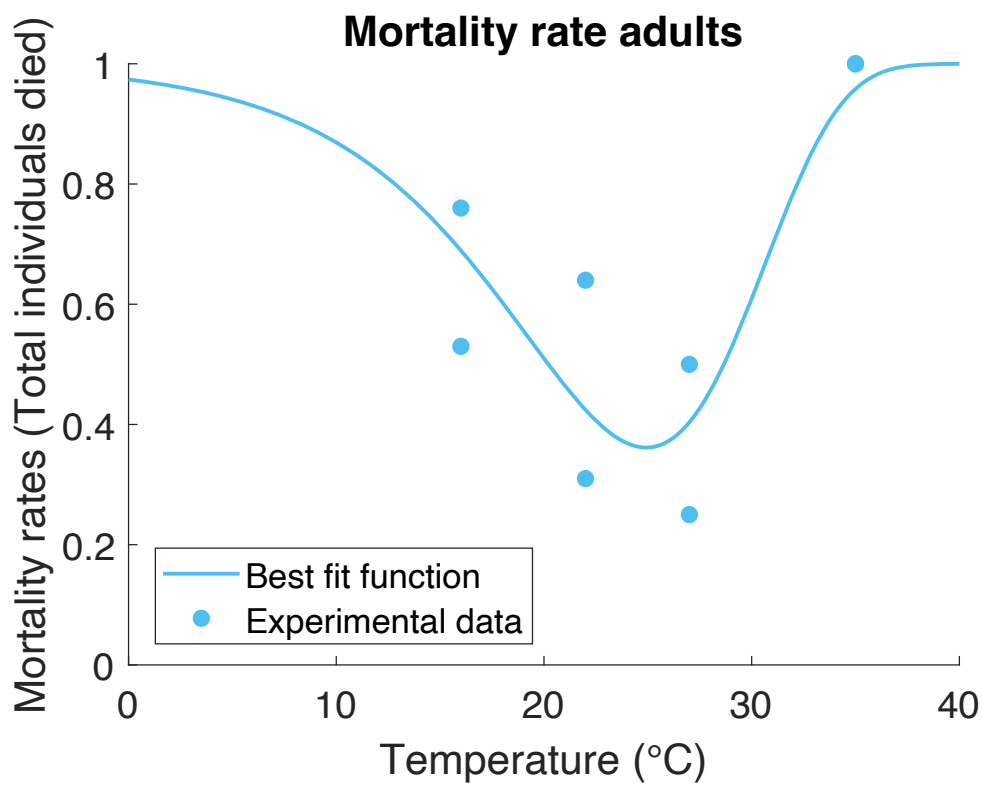

Figure S5: Best fit mortality rate function (7) for adults and experimental data from Preu et al. [1].

## References

1. Preu, M.; Friess, J.L.; Breckling, B.; Schröder, W. *Case Study 1: Olive Fruit Fly (Bactrocera Oleae)*; von Gleich, A., Schröder, W., Eds.; Springer International Publishing: Cham, 2020; ISBN 978-3-030-38933-8.
